# Supplementary material for: A Novel High-Throughput Assay Reveals That the Temperature Induced Increases in Transphosphatidylation of Phospholipase D Are Dependent on the Alcohol Acceptor Concentration
Source: MDPI journal article supplement (doi:10.3390/biom12050632), 2022-04-25
Supplement: s1 [file s1]

## Supplementary information

**Table S1.** Data used to plot fluorescence intensity of 100 nmol of DOPE against time at three different temperatures (**Figure 3**) in the article

| Time (s) | 25 (°C)  |          | 35 (°C)  |          | 45 (°C)  |          |
|----------|----------|----------|----------|----------|----------|----------|
|          | mean     | SD       | mean     | SD       | mean     | SD       |
| 0        | 4499.194 | 583.8037 | 3274.388 | 32.77655 | 2887.817 | 90.33696 |
| 60       | 6410.611 | 872.7948 | 6899.516 | 737.9673 | 6940.78  | 246.4926 |
| 120      | 8147.934 | 975.2078 | 9044.118 | 1052.231 | 9535.673 | 210.9706 |
| 180      | 9295.609 | 1057.73  | 10566.32 | 1298.397 | 11401.24 | 350.092  |
| 240      | 10235.01 | 1063.371 | 11740.65 | 1302.659 | 12857.65 | 361.2206 |
| 300      | 11045.7  | 1042.004 | 12802.19 | 1221.793 | 14253.44 | 301.3538 |
| 360      | 11756.41 | 1052.38  | 13678.39 | 1245.035 | 15563.54 | 225.025  |
| 420      | 12626.61 | 954.3641 | 14543.25 | 1177.671 | 17183.86 | 342.4059 |
| 480      | 13272.23 | 892.6794 | 15668.27 | 1020.017 | 18832.39 | 140.8781 |
| 540      | 14053.87 | 861.8426 | 16523.84 | 888.1718 | 21046.61 | 394.0589 |
| 600      | 14803.84 | 892.2085 | 17693.75 | 796.0663 | 22784.84 | 382.407  |
| 660      | 15535.6  | 856.5149 | 18549.93 | 590.9706 | 25050.24 | 597.4319 |
| 720      | 16375.8  | 876.1763 | 19882.83 | 609.1348 | 27473.31 | 719.8531 |
| 780      | 17336.24 | 765.5259 | 21007    | 500.284  | 29885.42 | 867.8354 |
| 840      | 18142.68 | 803.9009 | 22272.25 | 489.8044 | 32060.63 | 991.3911 |
| 900      | 19076.66 | 777.2534 | 23837.3  | 525.7351 | 34318.08 | 1180.385 |
| 960      | 20014.92 | 773.3356 | 24997.46 | 466.9905 | 36393.26 | 1232.31  |
| 1020     | 20849.61 | 784.7835 | 26539.02 | 472.7081 | 38738.82 | 1370.207 |
| 1080     | 21700.13 | 870.6787 | 27839.77 | 591.9739 | 40987.14 | 1470.168 |
| 1140     | 22869.28 | 811.8629 | 29711.21 | 397.0424 | 43555.32 | 1670.398 |
| 1200     | 23901.53 | 908.3221 | 30972.95 | 500.2472 | 45399.77 | 1763.948 |
| 1260     | 25068.08 | 822.0312 | 32546.92 | 547.3213 | 47070.48 | 1666.302 |
| 1320     | 26064.3  | 899.9129 | 34249.7  | 716.6748 | 49858.46 | 1990.79  |
| 1380     | 27041.77 | 865.5453 | 35839.95 | 503.0979 | 51507.85 | 2009.505 |
| 1440     | 28495.33 | 886.5757 | 37884.42 | 777.1764 | 52998.39 | 1714.186 |

|      |          |          |          |          |          |          |
|------|----------|----------|----------|----------|----------|----------|
| 1500 | 29353.05 | 833.2467 | 39475.21 | 647.4537 | 54600.86 | 1591.408 |
| 1560 | 31070.28 | 935.4415 | 41490.17 | 812.0231 | 55691.64 | 1286.192 |
| 1620 | 32024.43 | 987.9983 | 42895.8  | 920.8245 | 57149.53 | 963.1732 |
| 1680 | 33494.65 | 993.1041 | 45110.91 | 926.9754 | 57186.26 | 874.9758 |
| 1740 | 34785.95 | 1102.562 | 46527.35 | 981.5254 | 58111.29 | 552.0055 |
| 1800 | 36230.77 | 995.759  | 48087.88 | 1125.188 | 58412.36 | 479.0628 |
| 1860 | 37629.19 | 927.0489 | 50607.32 | 1071.173 | 58357.83 | 229.5984 |
| 1920 | 39085.76 | 855.6082 | 52395.27 | 1100.189 | 58721    | 122.0745 |
| 1980 | 40576.44 | 844.5278 | 54367.62 | 1106.565 | 58460.65 | 250.8308 |
| 2040 | 42072.1  | 1152.673 | 56339.64 | 856.0285 | 58100.84 | 403.6967 |
| 2100 | 43672.61 | 1033.899 | 57542.89 | 705.5685 | 57584.07 | 665.0955 |
| 2160 | 45072.7  | 1162.284 | 59117.06 | 677.0851 | 56555.11 | 668.3813 |
| 2220 | 46188.52 | 1070.483 | 60229.16 | 617.3986 | 56264.04 | 909.369  |
| 2280 | 48102.72 | 1082.501 | 61298.11 | 598.6229 | 55538    | 1369.406 |
| 2340 | 49509.96 | 1181.327 | 62798.64 | 660.3454 | 55027.11 | 1410.801 |
| 2400 | 51610.06 | 900.5501 | 63644.64 | 466.9333 | 53988.83 | 1592.302 |
| 2460 | 52620.3  | 1107.232 | 64458.24 | 416.5623 | 53160.03 | 1627.946 |
| 2520 | 54347.8  | 1117.643 | 64686.77 | 380.9819 | 52058.36 | 1853.41  |
| 2580 | 55780.8  | 1228.864 | 65795.17 | 419.9381 | 51127.54 | 1903.031 |
| 2640 | 57334.06 | 1387.676 | 66099.79 | 361.1667 | 50177.13 | 1976.025 |
| 2700 | 58288.67 | 1452.933 | 67289.8  | 644.3166 | 49165.33 | 1907.718 |
| 2760 | 60137.74 | 1228.564 | 67548.01 | 480.2527 | 48167.55 | 2140.451 |
| 2820 | 61617.54 | 1408.637 | 68268.24 | 172.57   | 46987.44 | 2108.288 |
| 2880 | 62577.76 | 1504.03  | 68623.22 | 262.7061 | 45717.01 | 2108.823 |
| 2940 | 63711.73 | 1320.712 | 68414.29 | 532.8977 | 44654.28 | 2231.181 |
| 3000 | 64678.92 | 1590.048 | 69088.4  | 399.0363 | 43584.45 | 2321.327 |
| 3060 | 65608.18 | 1392.6   | 69479.55 | 409.7262 | 42635.8  | 2452.376 |
| 3120 | 66495.69 | 1559.772 | 69437.23 | 680.8645 | 41536.89 | 2282.98  |
| 3180 | 67267.02 | 1303.772 | 69821.77 | 677.3014 | 40240.43 | 2311.242 |
| 3240 | 68194.04 | 1935.837 | 69479.69 | 837.0908 | 39349.83 | 2426.374 |

|      |          |          |          |          |          |          |
|------|----------|----------|----------|----------|----------|----------|
| 3300 | 69036.93 | 1546.351 | 69300.05 | 916.6825 | 38132.51 | 2430.494 |
| 3360 | 70102.72 | 1592.959 | 69808.18 | 880.9682 | 37069.1  | 2434.517 |
| 3420 | 70981.84 | 1942.372 | 69609.96 | 1088.704 | 36207.63 | 2304.263 |
| 3480 | 71141.51 | 1555.671 | 69283.44 | 1066.315 | 34909.75 | 2426.253 |
| 3540 | 71828.66 | 1648.772 | 68696.39 | 1163.562 | 34134.35 | 2370.789 |
| 3600 | 72835.61 | 1558.228 | 68617.04 | 1264.179 | 33402.35 | 2259.382 |
| 3660 | 73337.6  | 1689.069 | 68325.75 | 1383.779 | 32392.22 | 2224.29  |
| 3720 | 73658.95 | 1862.39  | 68347.86 | 1326.547 | 31553.16 | 2331.793 |
| 3780 | 74316.22 | 1804.641 | 68102.75 | 1469.793 | 30533.99 | 2155.366 |
| 3840 | 74669.05 | 1999.504 | 67513.21 | 1417.39  | 29581.99 | 2289.17  |
| 3900 | 75468.61 | 1802.4   | 67338.72 | 1698.281 | 28808.81 | 2090.136 |
| 3960 | 75360.3  | 2085.813 | 66495.91 | 1796.579 | 28235.87 | 2055.45  |
| 4020 | 75899.67 | 2018.168 | 66536.75 | 1789.366 | 27374.11 | 2101.05  |
| 4080 | 76216.6  | 2171.51  | 66447.64 | 1856.362 | 26692.47 | 2156.67  |
| 4140 | 76576.45 | 2038.529 | 65003.75 | 1726.372 | 26038.6  | 2000.17  |
| 4200 | 76700.9  | 1896.615 | 64755.99 | 1594.223 | 25179.33 | 1959.182 |
| 4260 | 77298.56 | 1880.895 | 64384.7  | 1813.054 | 24302.56 | 1909.258 |
| 4320 | 76913.39 | 2223.14  | 64083.1  | 2022.845 | 23863.43 | 1808.231 |
| 4380 | 77376.64 | 2408.338 | 63664.17 | 2071.28  | 23291.63 | 1793.733 |
| 4440 | 77700.33 | 2153.691 | 63422.92 | 1955.331 | 22447.06 | 1680.828 |
| 4500 | 77859.61 | 2176.443 | 63126.15 | 1865.832 | 21748.91 | 1553.879 |
| 4560 | 78733.58 | 2155.231 | 61889.98 | 2092.759 | 21337.65 | 1589.524 |
| 4620 | 78165.58 | 2536.668 | 61453.13 | 2005.026 | 20687.25 | 1604.772 |
| 4680 | 78200.29 | 2639.106 | 60468.62 | 2162.184 | 19984.79 | 1430.534 |
| 4740 | 78245.53 | 2389.328 | 60624.35 | 2186.284 | 19630.03 | 1454.946 |
| 4800 | 77666.43 | 2367.846 | 59837.15 | 2081.61  | 19037.83 | 1309.198 |
| 4860 | 78452.33 | 2832.514 | 59298.39 | 2023.749 | 18611.16 | 1410.634 |
| 4920 | 78129.01 | 2291.157 | 58722.61 | 2232.001 | 17925.29 | 1189.729 |
| 4980 | 77875.59 | 1904.885 | 58513.69 | 2180.713 | 17504.77 | 1314.267 |
| 5040 | 78268.01 | 2302.4   | 57856.06 | 2255.51  | 17010.22 | 1308.697 |

|      |          |          |          |          |          |          |
|------|----------|----------|----------|----------|----------|----------|
| 5100 | 77733.09 | 2552.368 | 57336.15 | 2345.419 | 16559.59 | 1096.287 |
| 5160 | 78285.51 | 2426.077 | 56757.54 | 2378.633 | 16046.31 | 1054.169 |
| 5220 | 78565.55 | 2311.877 | 56061.36 | 2183.949 | 15763.91 | 1072.56  |
| 5280 | 77454.4  | 2601.368 | 55616.74 | 2336.459 | 15348.56 | 1046.005 |
| 5340 | 78074.91 | 2703.035 | 54730.62 | 2287.293 | 14848.53 | 892.086  |
| 5400 | 77879.06 | 2433.179 | 54207.28 | 2276.007 | 14523.37 | 899.842  |
| 5460 | 77894.07 | 2432.536 | 54012.76 | 2350.431 | 14082.05 | 724.5971 |
| 5520 | 77662.16 | 2746.508 | 53084.93 | 2491.811 | 13830.09 | 816.5219 |
| 5580 | 76663.96 | 2757.643 | 52299.13 | 2448.305 | 13557.01 | 794.8246 |
| 5640 | 77656.48 | 2697.215 | 51974.09 | 2579.856 | 13125.75 | 807.8704 |
| 5700 | 76502.67 | 2941.251 | 51386.76 | 2155.688 | 12819.65 | 637.6701 |
| 5760 | 76916.97 | 2629.187 | 51117.23 | 2249.964 | 12436.24 | 669.0284 |
| 5820 | 76936.12 | 2841.956 | 50151.4  | 2342.688 | 12246.92 | 519.5943 |
| 5880 | 77113.92 | 2787.696 | 49916.14 | 2431.344 | 11967.68 | 553.8175 |
| 5940 | 76437.76 | 2668.789 | 49090.84 | 2424.41  | 11647.3  | 489.0663 |
| 6000 | 76506.38 | 2363.458 | 48455.91 | 2290.459 | 11380.58 | 382.1291 |
| 6060 | 76137.16 | 2635.957 | 48648.22 | 2466.849 | 11133.05 | 454.139  |
| 6120 | 75528.54 | 2369.322 | 47671.07 | 2420.811 | 10850.89 | 468.4409 |
| 6180 | 75411.69 | 2482.373 | 47005.13 | 2341.687 | 10592.48 | 344.8467 |
| 6240 | 75663.72 | 2616.013 | 46689.59 | 2436.367 | 10509.21 | 391.4709 |
| 6300 | 75171.59 | 2306.776 | 46007.43 | 2316.634 | 10174.59 | 301.9067 |
| 6360 | 75363.33 | 2563.506 | 45542.7  | 2524.974 | 9945.051 | 263.014  |
| 6420 | 74714.64 | 2600.661 | 44695.29 | 2270.446 | 9767.512 | 285.6759 |
| 6480 | 74471.85 | 2673.482 | 44040.54 | 2345.156 | 9553.648 | 282.0914 |
| 6540 | 74535.13 | 2321.205 | 44172.21 | 2173.539 | 9285.669 | 302.7513 |
| 6600 | 74417.56 | 2565.957 | 43192.4  | 2188.527 | 9137.308 | 267.5367 |
| 6660 | 73603.32 | 2373.818 | 42647.32 | 2238.829 | 8974.514 | 244.2455 |
| 6720 | 73985.85 | 2522.79  | 42148.46 | 2250.868 | 8730.317 | 148.9735 |
| 6780 | 73310.16 | 2237.392 | 41825.85 | 2339.482 | 8570.141 | 286.2375 |
| 6840 | 73298.09 | 2053.997 | 41170.78 | 2233.298 | 8383.487 | 290.4452 |

|      |          |          |          |          |          |          |
|------|----------|----------|----------|----------|----------|----------|
| 6900 | 73085.39 | 2426.733 | 40587.31 | 2206.575 | 8283.886 | 225.023  |
| 6960 | 72787.03 | 1997.688 | 39967.03 | 2241.098 | 8000.846 | 254.401  |
| 7020 | 72486.91 | 2107.95  | 39713.11 | 2190.575 | 7880.93  | 248.6714 |
| 7080 | 72074.67 | 2564.624 | 39387.34 | 2254.944 | 7677.021 | 280.7476 |
| 7140 | 71949.4  | 2186.319 | 38979.23 | 2209.668 | 7628.111 | 289.7193 |
| 7200 | 72272.39 | 2438.546 | 38476.55 | 2268.112 | 7380.346 | 181.6592 |

**Table S2.** Data used to plot DOPE calibration curve (**Figure 4A**) in the article

| DOPE<br>(nmol) | Fluorescence intensity |          |
|----------------|------------------------|----------|
|                | mean                   | SD       |
| 0              | 0                      | 0        |
| 1              | 4477.29                | 504.7434 |
| 2              | 6835.147               | 175.2168 |
| 3              | 8918.576               | 483.774  |
| 5              | 13261.22               | 927.135  |
| 8              | 18153.63               | 245.983  |
| 12             | 28126.96               | 1038.017 |

**Table S3.** Data used to plot PLD units linearity testing (**Figure 4B**) in the article

| PLD units | DOPE (nmol) |          |
|-----------|-------------|----------|
|           | mean        | SD       |
| 0.001     | 2.031274    | 0.341593 |
| 0.003     | 3.432972    | 0.422641 |
| 0.005     | 4.065907    | 0.42714  |
| 0.01      | 4.346704    | 0.376864 |
| 0.02      | 7.386858    | 0.932969 |
| 0.03      | 8.99207     | 0.939238 |
| 0.06      | 12.38254    | 1.377784 |
| 0.1       | 14.31833    | 0.646128 |

**Table S4.** Data used to plot time linearity of transphosphatidylation with ethanolamine (500 mM) and 0.01 units of PLD (**Figure 4C**) in the article

| Time (min) | DOPE (nmol) |          |
|------------|-------------|----------|
|            | mean        | SD       |
| 5          | 2.182443    | 0.684717 |
| 10         | 3.578789    | 0.216799 |
| 15         | 4.550812    | 0.261053 |
| 25         | 6.165255    | 0.25246  |
| 35         | 8.049491    | 0.659589 |
| 50         | 9.365412    | 0.195342 |
| 60         | 9.992835    | 1.40579  |

**Table S5.** Data used to determine kinetic parameters of PLD *Streptomyces* sp. towards ethanolamine at 37 and 60 °C (**Figure 5**) in the article

| Ethanolamine (mM) | 37 (°C)  |          | 60 (°C)  |          |
|-------------------|----------|----------|----------|----------|
|                   | mean     | SD       | mean     | SD       |
| 12.5              | 1.858035 | 0.13139  | 3.295453 | 0.24411  |
| 20                | 2.321125 | 0.095066 | 4.988083 | 0.371909 |
| 25                | 3.271484 | 0.05609  | 4.479388 | 0.298757 |
| 50                | 3.718456 | 0.280418 | 6.107876 | 0.227058 |
| 100               | 4.795751 | 0.251637 | 7.690892 | 0.466664 |
| 125               | 5.48729  | 0.136978 | 8.733923 | 0.888151 |
| 200               | 5.621171 | 0.263639 | 11.02671 | 0.935164 |
| 250               | 6.610619 | 0.184781 | 11.58572 | 0.475737 |
| 400               | 6.319729 | 0.146967 | 12.38867 | 0.532889 |
| 500               | 7.12515  | 1.022074 | 13.64659 | 0.489998 |
| 800               | 7.695747 | 1.036036 | 15.15168 | 1.392346 |
| 1000              | 8.724178 | 0.274728 | 16.89148 | 0.523712 |

**Table S6.** Data used to determine kinetic parameters of PLD *Streptomyces* sp. towards DOPC at 37 °C in the presence of different concentrations of ethanolamine (**Figure 6A**) in the article

| Ethanolamine (mM) |          |          |          |          |          |          |          |          |
|-------------------|----------|----------|----------|----------|----------|----------|----------|----------|
|                   | 100      |          | 200      |          | 400      |          | 800      |          |
| DOPC (mM)         | mean     | SD       | mean     | SD       | mean     | SD       | mean     | SD       |
| 0.1               | 1.975285 | 0.502566 | 1.314223 | 0.718753 | 2.36417  | 0.581278 | 1.561022 | 0.333776 |
| 0.2               | 2.279034 | 0.163405 | 3.299822 | 0.332536 | 3.031593 | 1.08272  | 1.711545 | 0.482574 |
| 0.4               | 3.076919 | 0.331298 | 5.651131 | 0.737525 | 4.879844 | 1.789135 | 3.658223 | 0.875492 |
| 0.6               | 4.256201 | 0.310297 | 6.656425 | 0.793591 | 6.106299 | 1.369577 | 5.730639 | 0.869276 |
| 0.8               | 4.559929 | 0.214148 | 6.418271 | 0.479008 | 6.689419 | 0.95179  | 5.92976  | 0.719898 |
| 1.0               | 4.964193 | 0.206302 | 6.827214 | 0.562191 | 7.690704 | 0.953211 | 6.25422  | 0.593052 |
| 1.5               | 4.763865 | 0.43034  | 6.534767 | 0.525872 | 6.818682 | 1.352979 | 6.584361 | 1.111261 |
| 2.0               | 4.014971 | 0.829897 | 6.40121  | 0.570206 | 5.415506 | 0.398558 | 5.484435 | 0.712584 |

**Table S7.** Data used to determine kinetic parameters of PLD *Streptomyces* sp. towards DOPC at 60 °C in the presence of different concentrations of ethanolamine (**Figure 6B**) in the article

| Ethanolamine (mM) |          |          |          |          |          |          |          |          |
|-------------------|----------|----------|----------|----------|----------|----------|----------|----------|
|                   | 100      |          | 200      |          | 400      |          | 800      |          |
| DOPC (mM)         | mean     | SD       | mean     | SD       | mean     | SD       | mean     | SD       |
| 0.1               | 2.2283   | 0.646326 | 1.72445  | 0.35687  | 3.379033 | 0.388723 | 3.787662 | 0.889216 |
| 0.4               | 4.134581 | 0.477251 | 5.336768 | 1.285188 | 6.251936 | 2.202897 | 6.310172 | 1.556995 |
| 0.6               | 5.36889  | 0.529432 | 6.332653 | 1.134589 | 7.726542 | 1.998625 | 7.723566 | 1.420609 |
| 0.8               | 5.403917 | 0.593516 | 7.107206 | 1.079323 | 8.494565 | 1.025114 | 8.480869 | 1.288735 |
| 1.0               | 5.580245 | 0.41319  | 7.97298  | 1.178932 | 10.53543 | 1.596381 | 10.80535 | 0.747081 |
| 1.5               | 6.086528 | 0.54639  | 7.879444 | 0.679168 | 15.38723 | 1.582769 | 16.88363 | 1.676352 |
| 2.0               | 5.902959 | 0.62304  | 7.190198 | 0.622239 | 16.06952 | 1.787034 | 18.73032 | 1.408083 |

**Table S8.** Data used to determine hydrolytic kinetic parameters of PLD *Streptomyces* sp. towards DOPC at 37 and 60 °C (**Figure 7**) in the article

| DOPC (mM) | 37 (°C)  |          | 60 (°C)  |          |
|-----------|----------|----------|----------|----------|
|           | mean     | SD       | mean     | SD       |
| 0.1       | 1.538938 | 0.096637 | 1.166421 | 0.065813 |
| 0.2       | 1.733576 | 0.013009 | 1.653721 | 0.101554 |
| 0.3       | 1.81498  | 0.055326 | 1.922722 | 0.067046 |
| 0.6       | 1.866105 | 0.015675 | 2.71226  | 0.369094 |
| 1.0       | 1.888357 | 0.020374 | 2.790143 | 0.323195 |
| 1.5       | 2.045673 | 0.014832 | 2.334955 | 0.166705 |
| 2.0       | 2.210454 | 0.013654 | 2.460723 | 0.200037 |
